# Supplementary material for: Developing a rehabilitation intervention for eating and drinking difficulties following stroke through co-design stakeholder workshops
Source: Research Square preprint supplement (doi:10.21203/rs.3.rs-8807334/v1), 2026-02-12

**Supplementary Figures**

**Supplementary Figure 1: Environmental Layout a) Site 1 b) Site 3**

1. **Site 1 Layout**


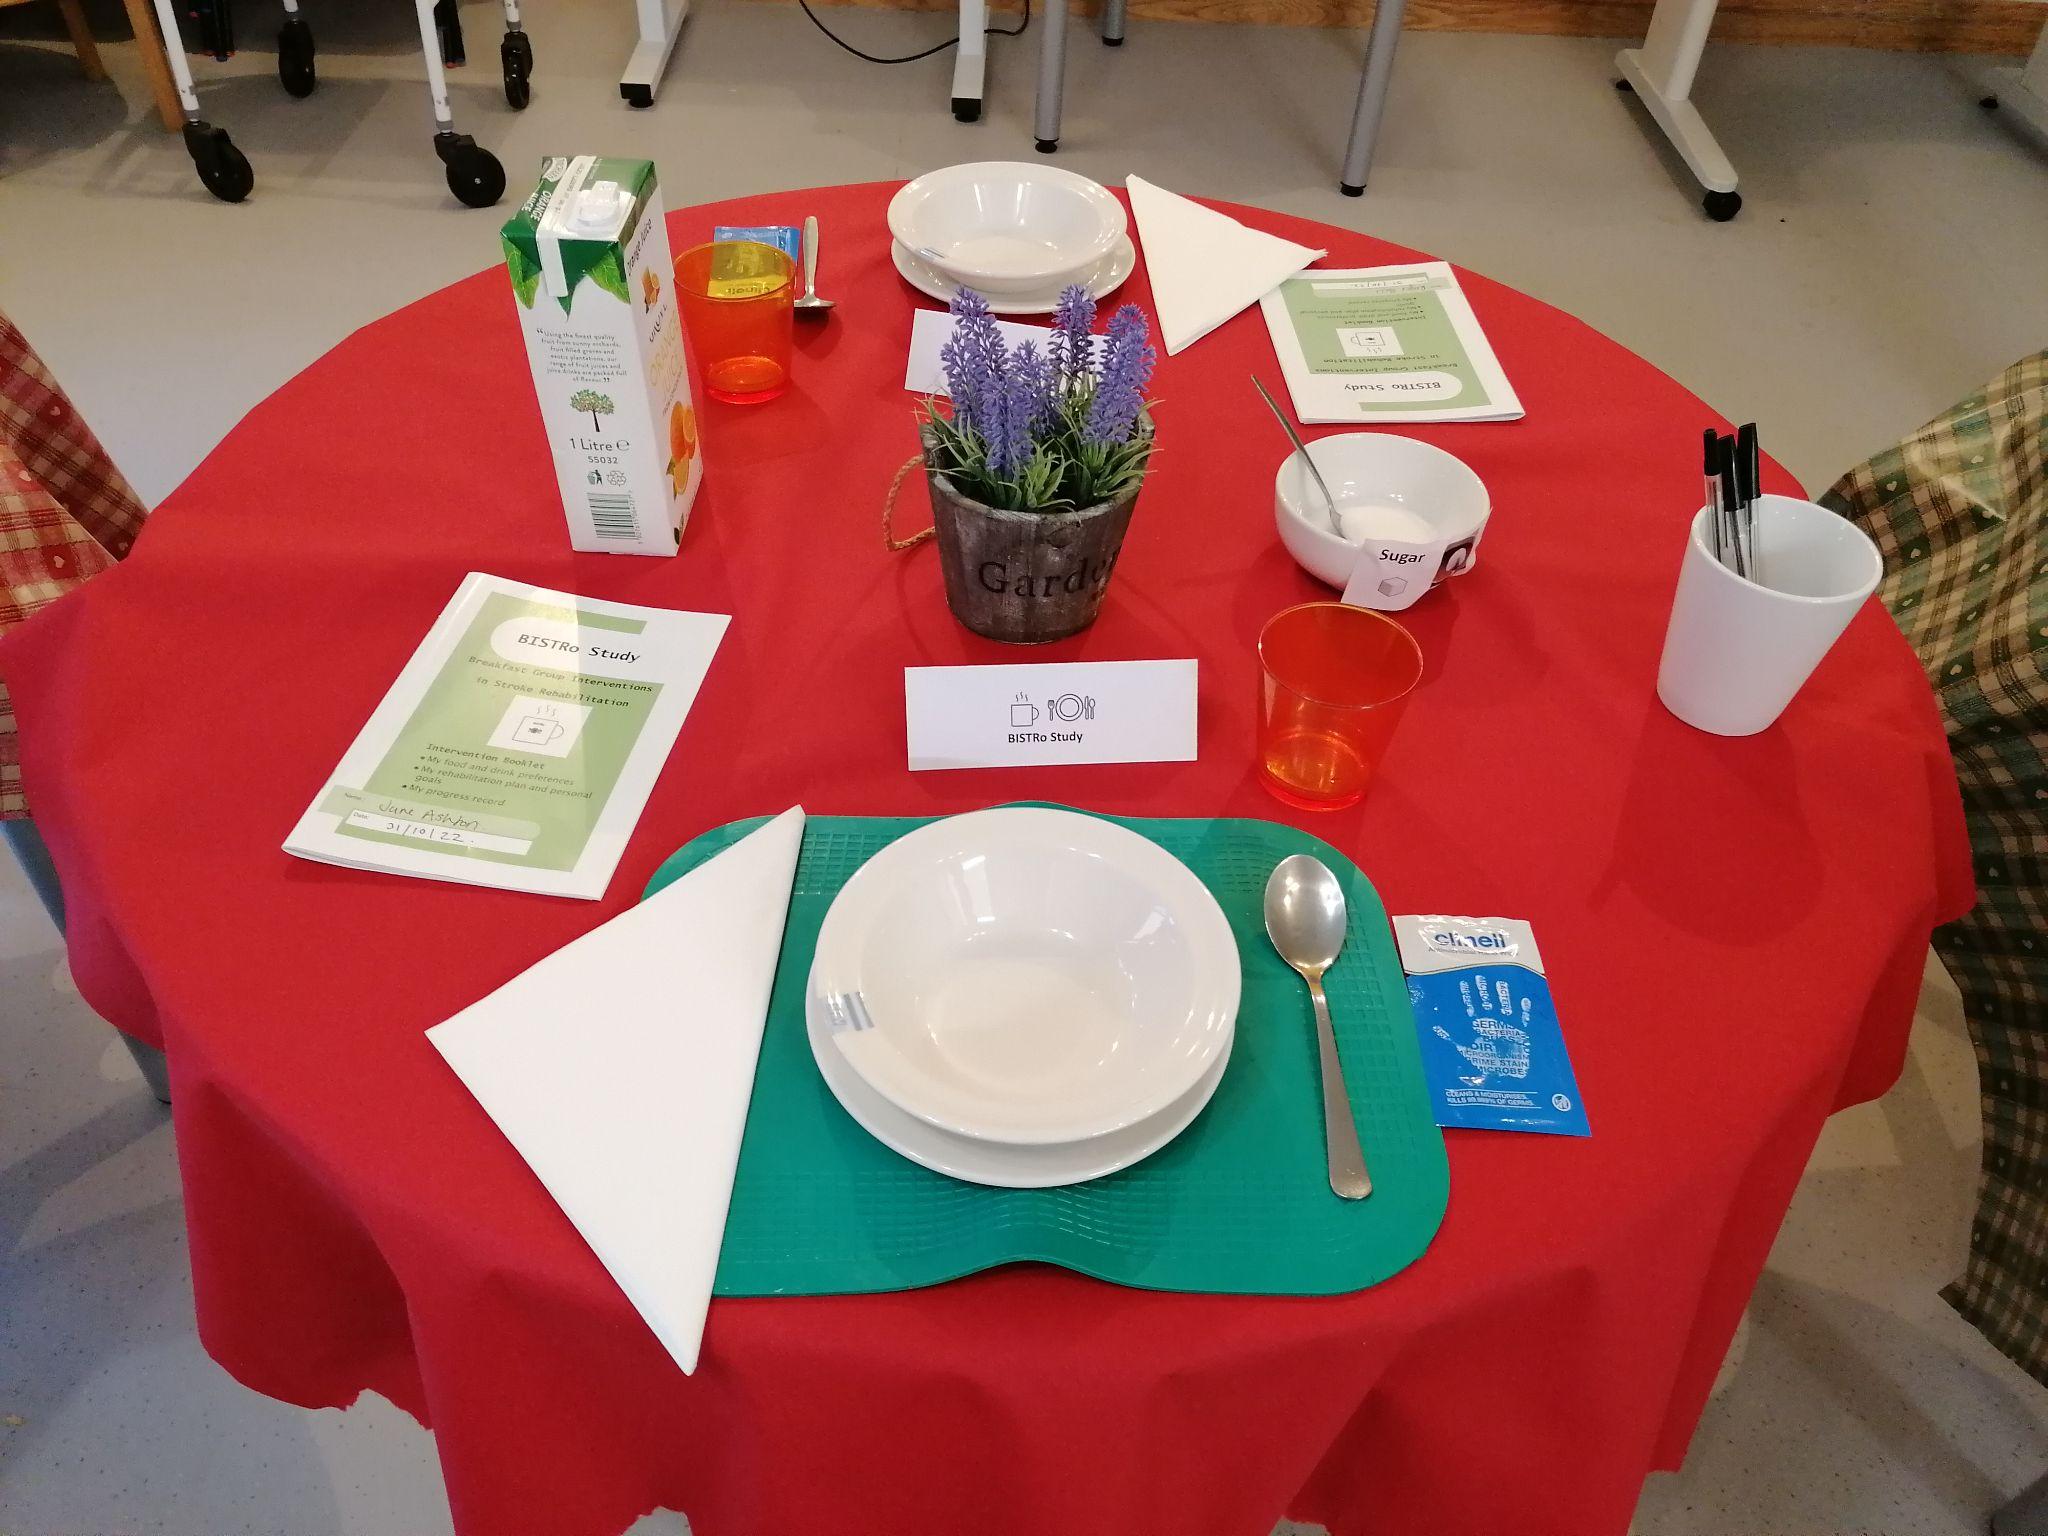


**b) Site 2 Layout**


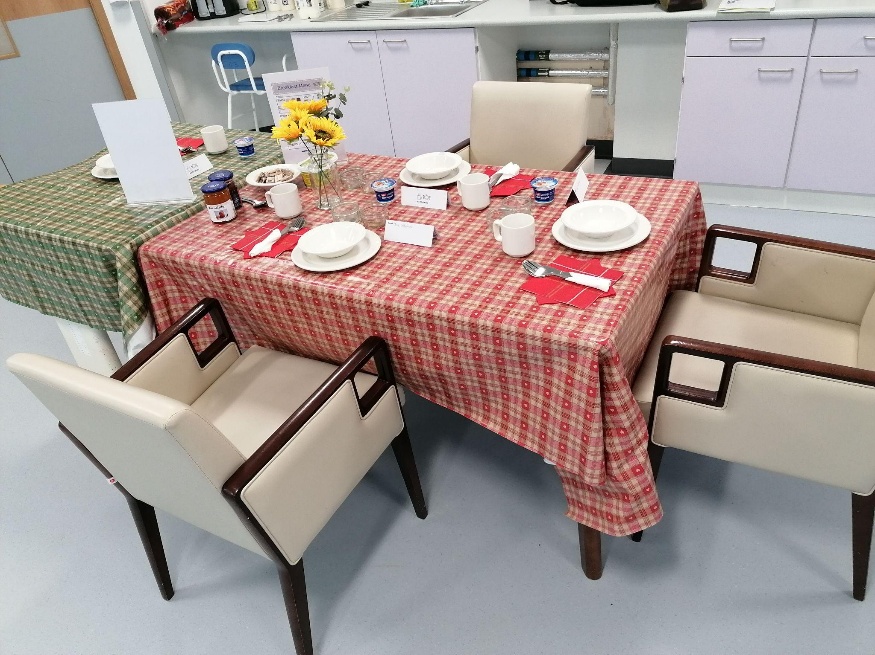


**Supplementary Figure 2: Food Preparation Station (Site 1)**


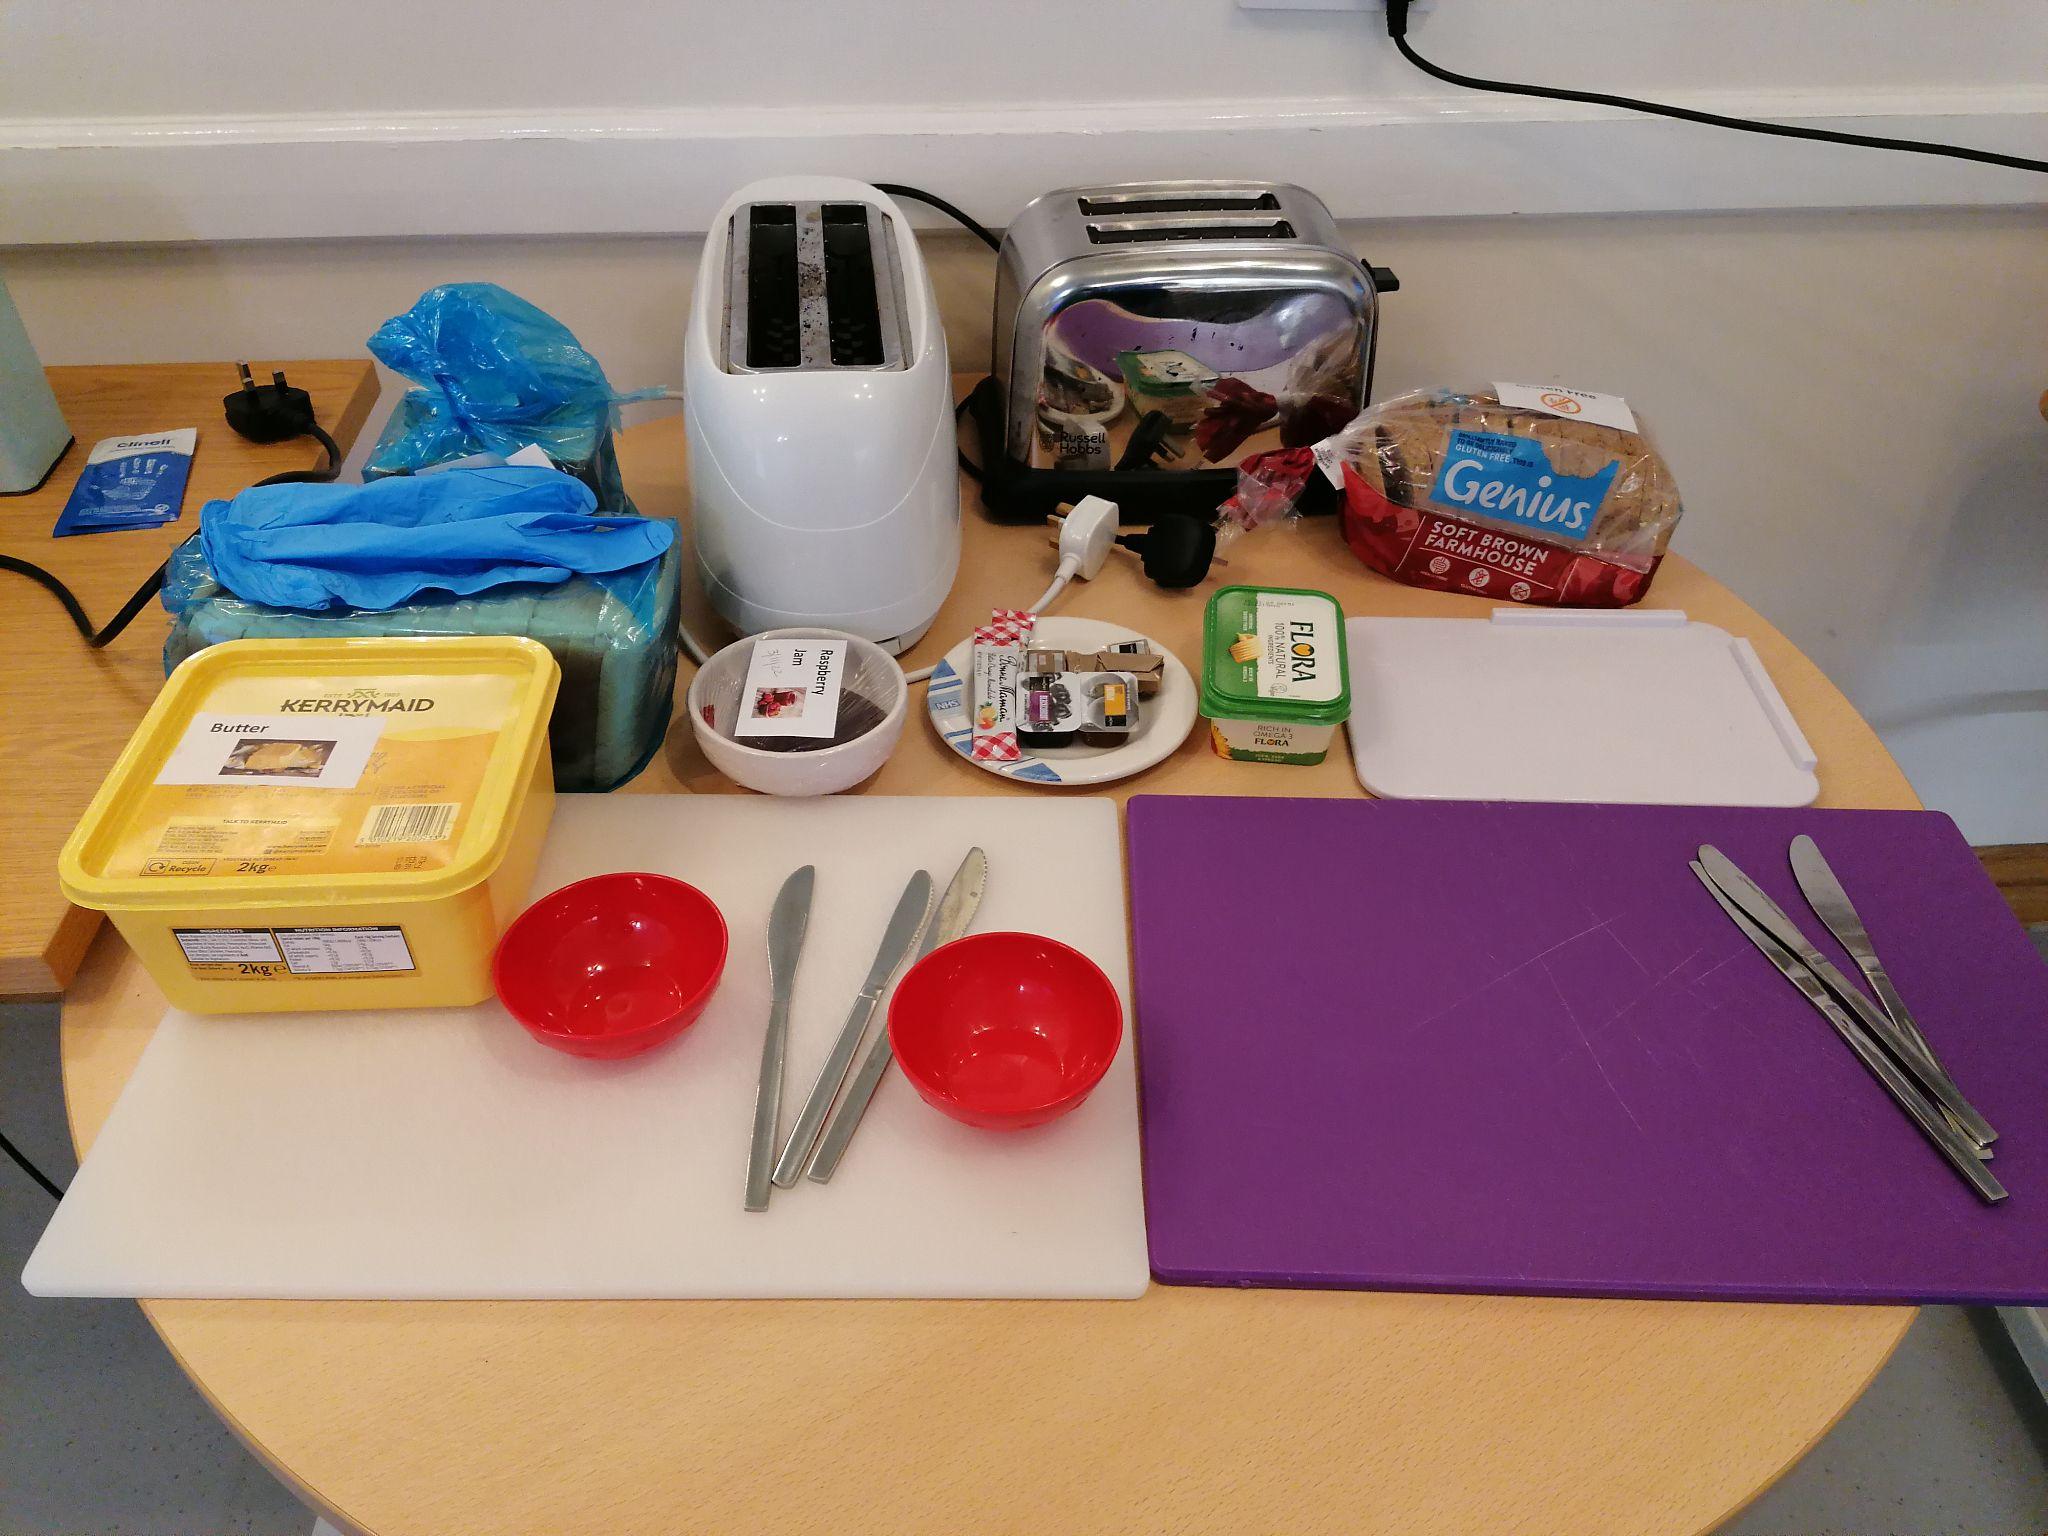


**Supplementary Figure 3: Food Preferences (Booklet illustration)**


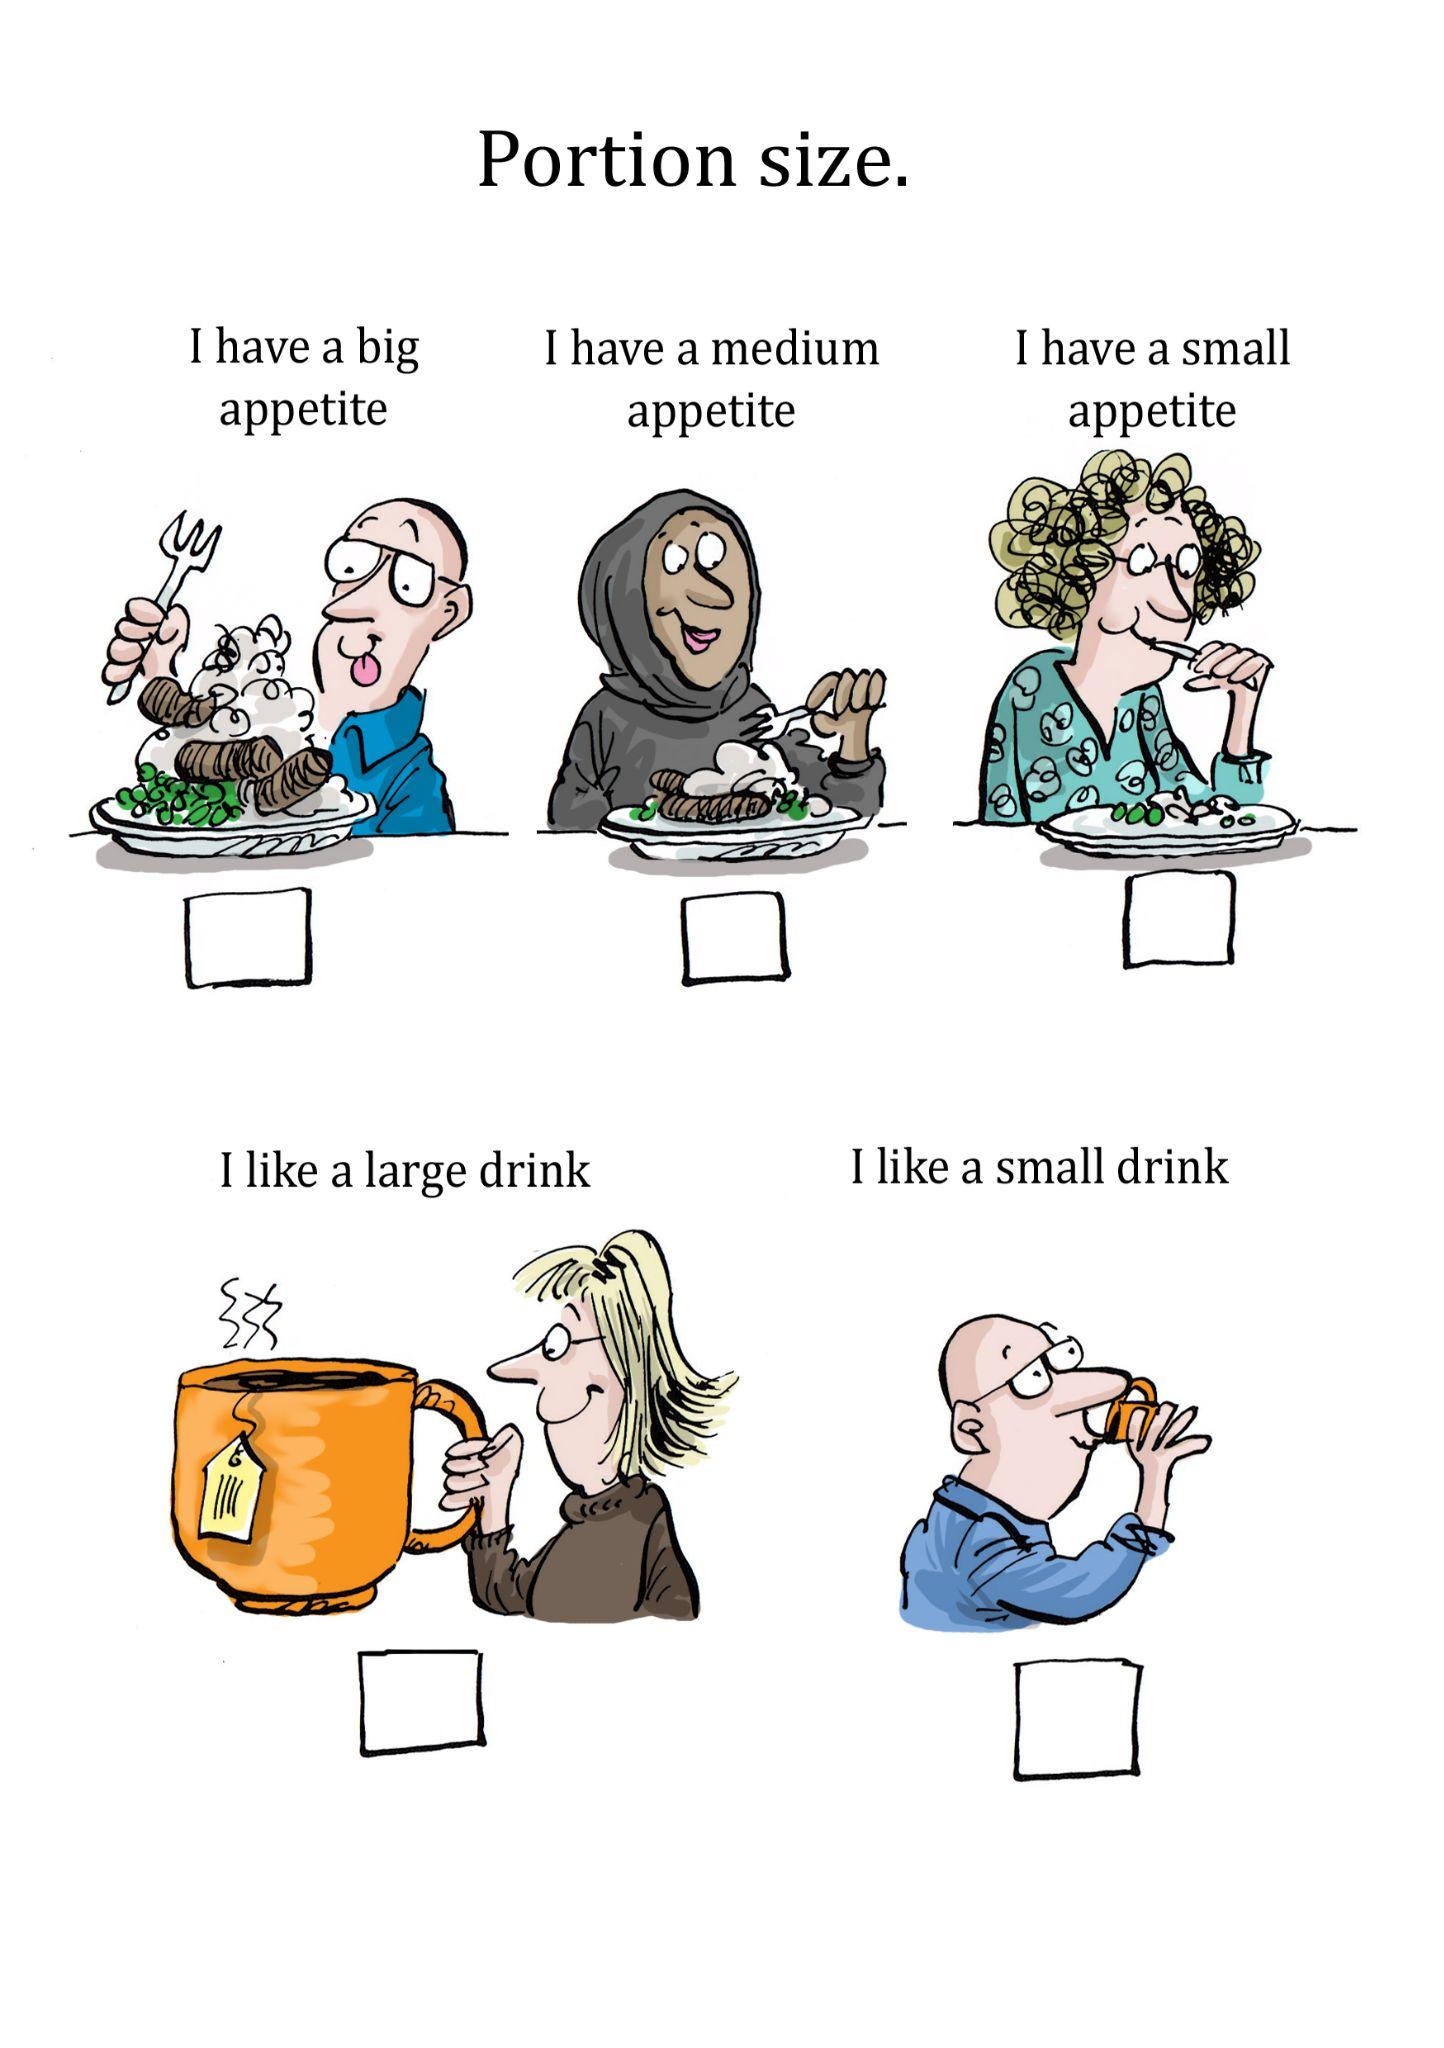


**Supplementary Figure 4: Patient completing the daily log in the patient booklet.**


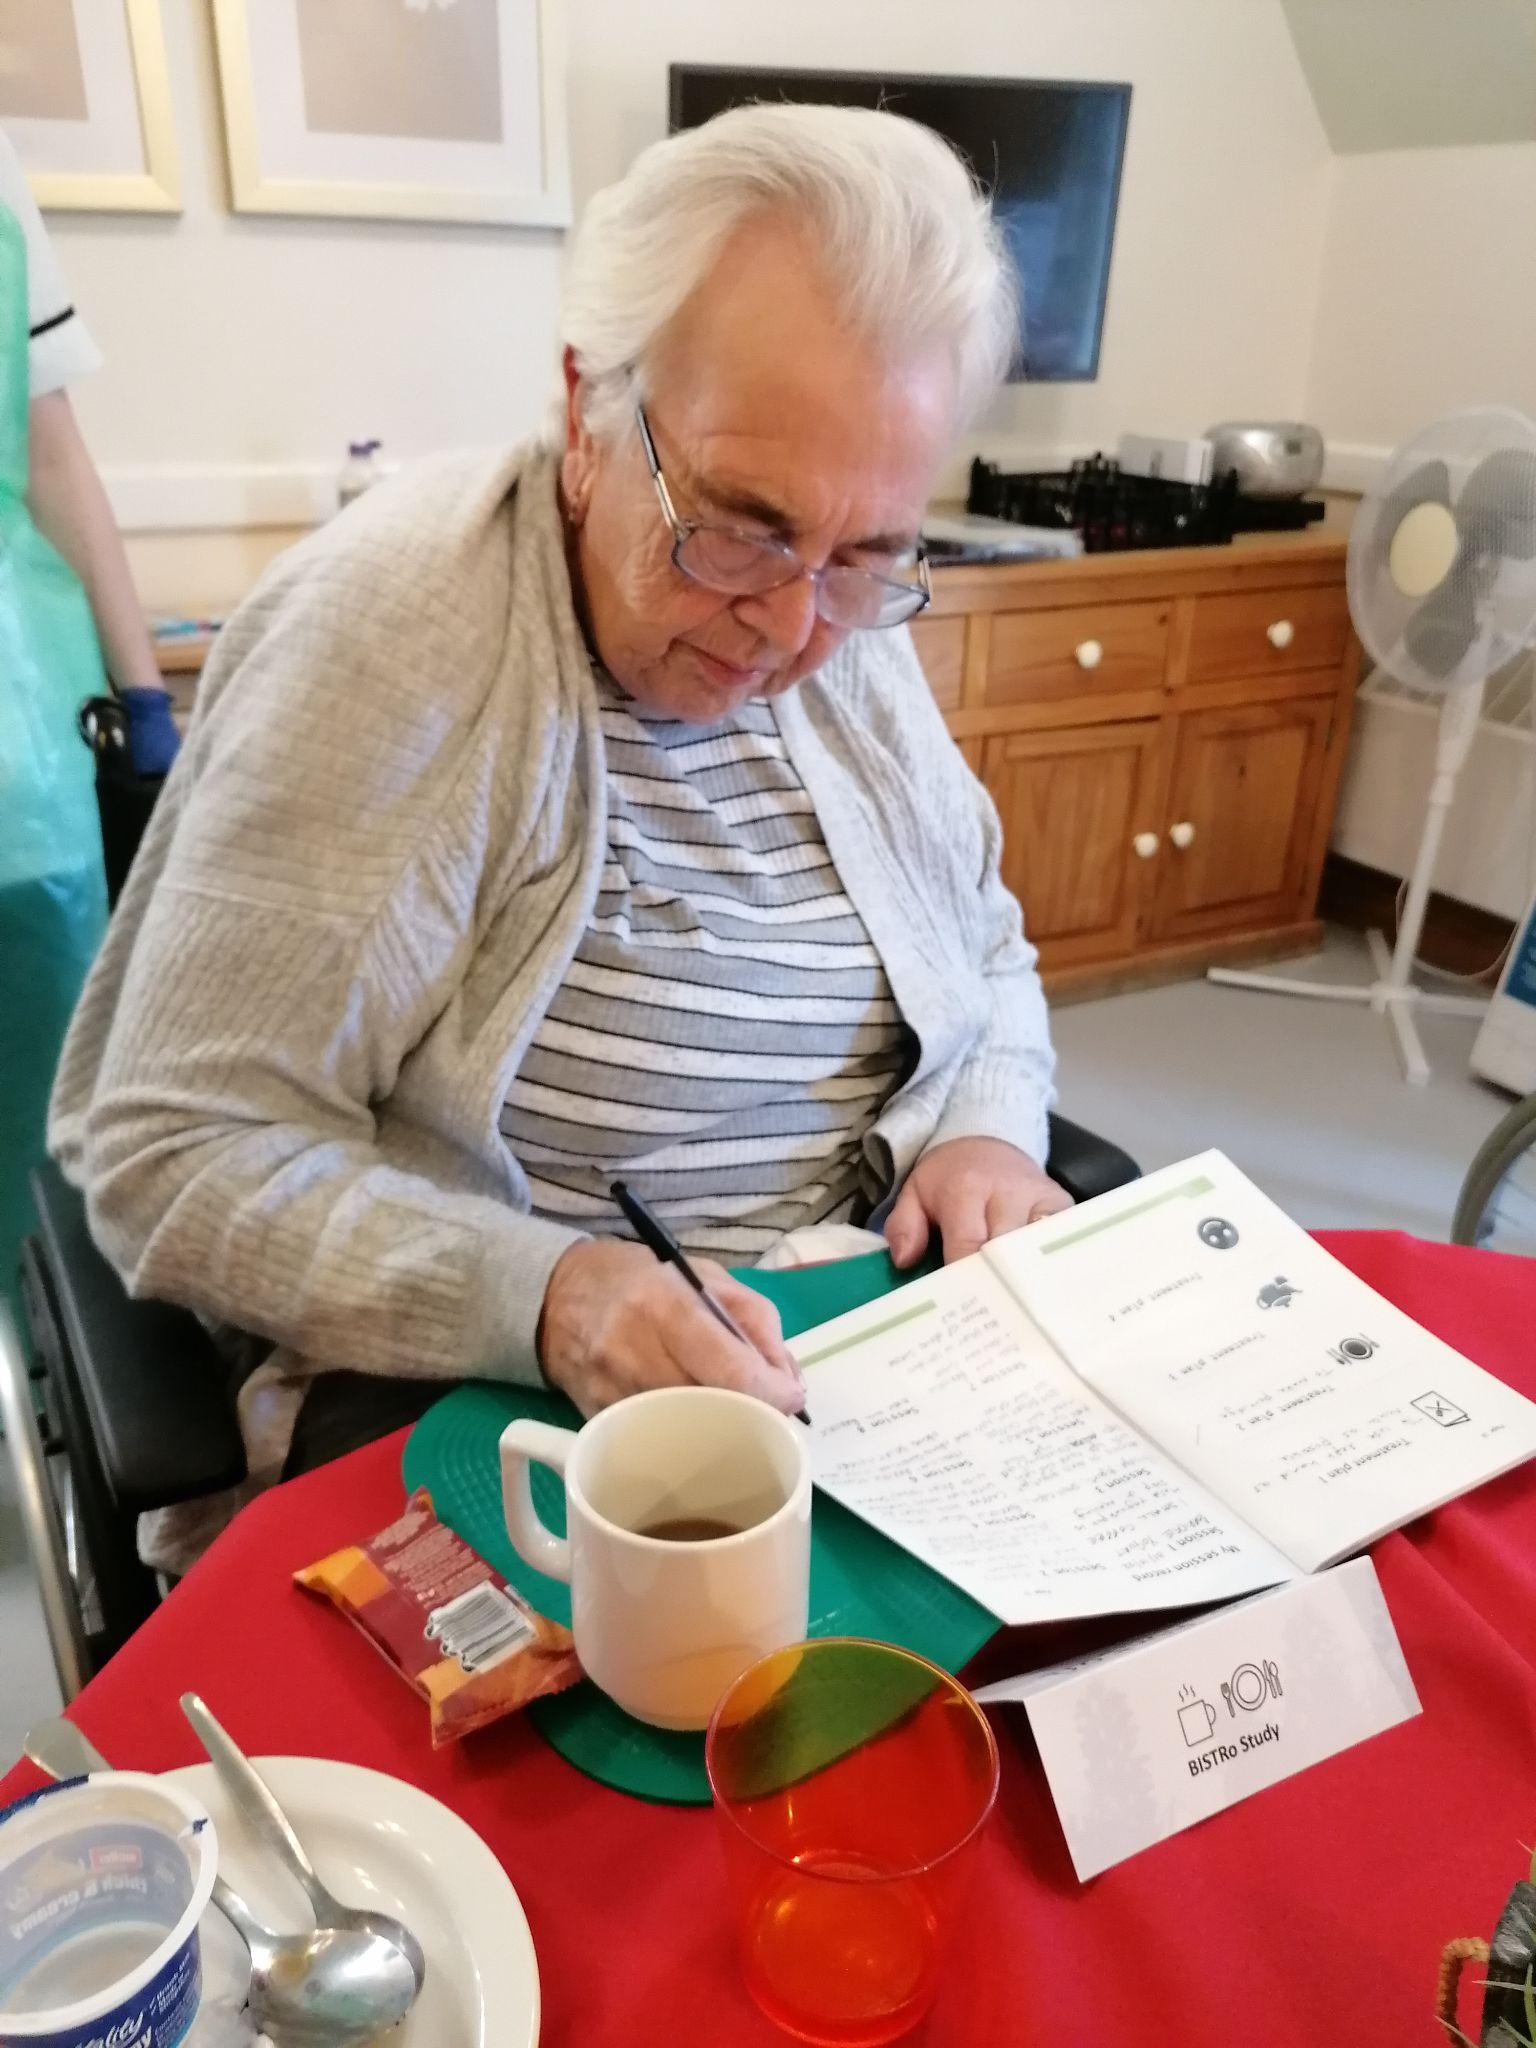


**Supplementary Figure 5: Healthy Eating Illustrations**


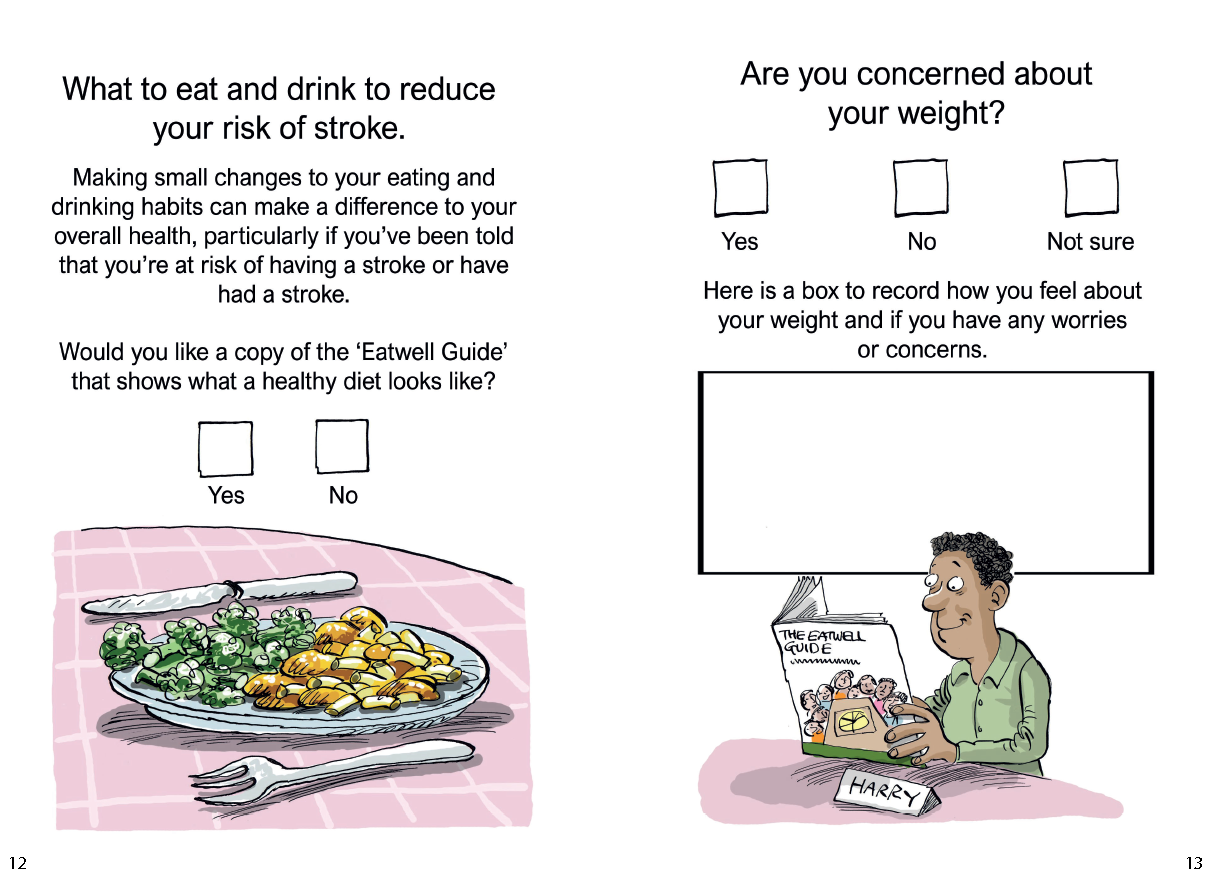


**Supplementary Figure 6: Codesign Poster (used in the open research event to engage key stakeholders).**


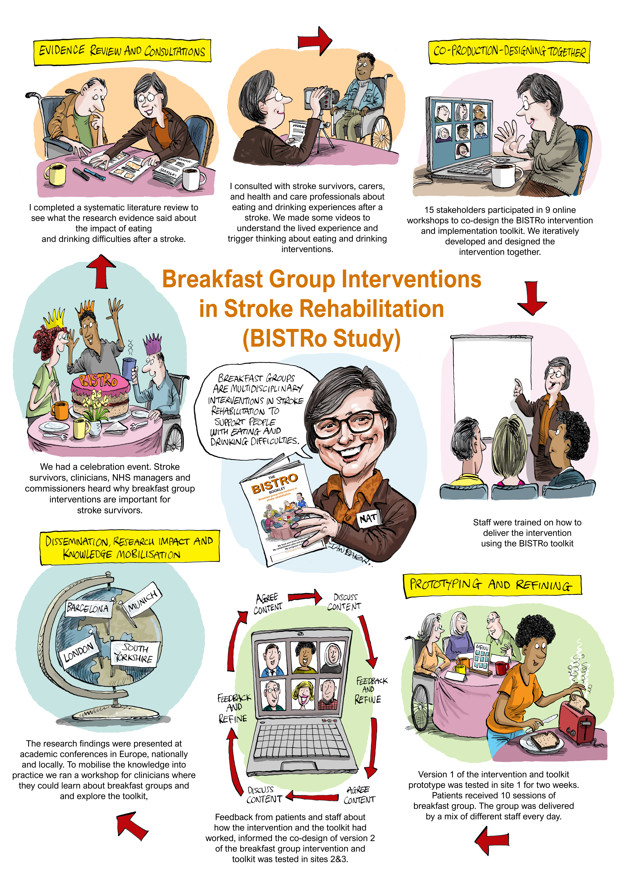


**Supplementary Figure 7: Stroke Survivor Poem**


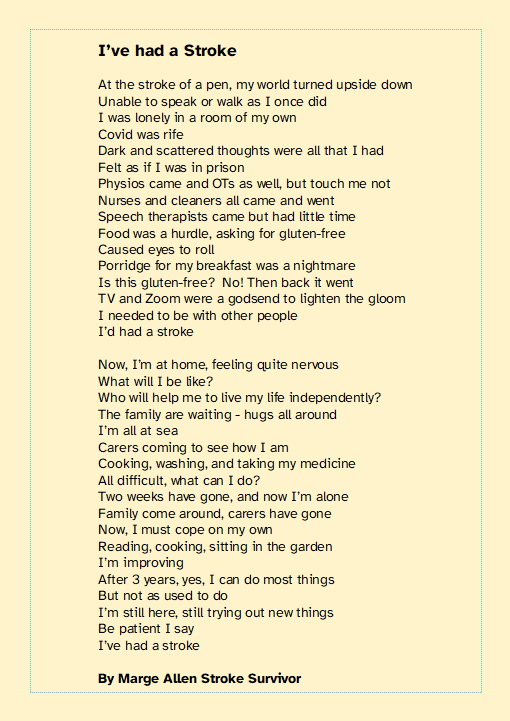


**Supplementary Figure 8: Artefacts from the open research event a) Patient Booklet**

**b) Illustrations c) The Breakfast Group d) Food Preparation**

1. **Patient Booklet b) Illustrations with quotes**


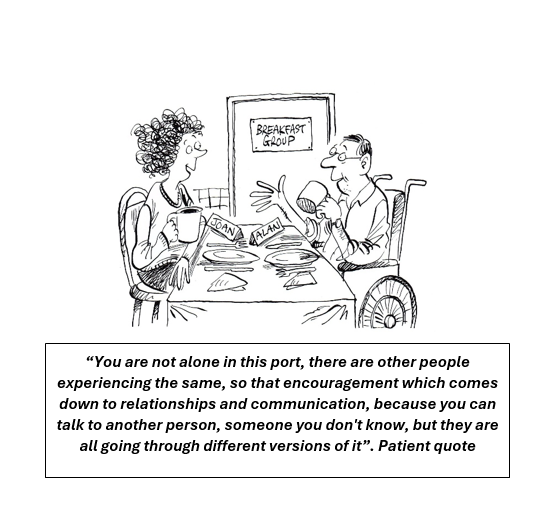

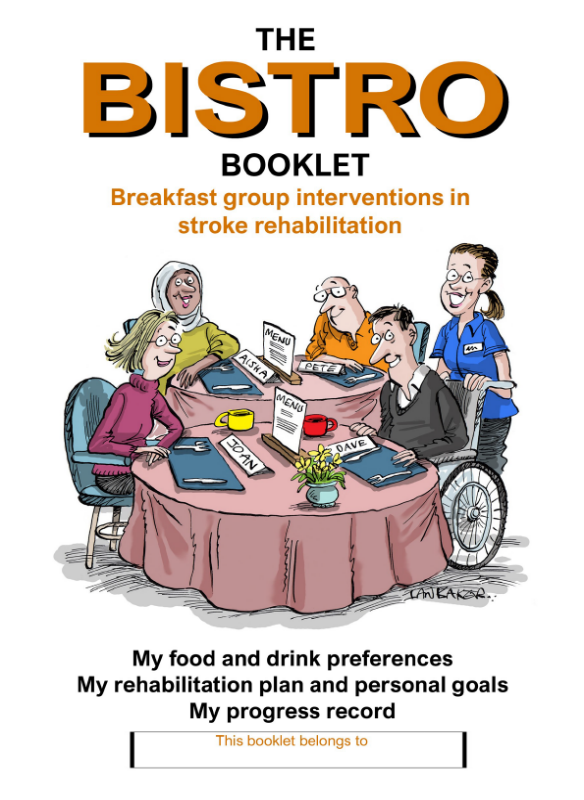


1. **
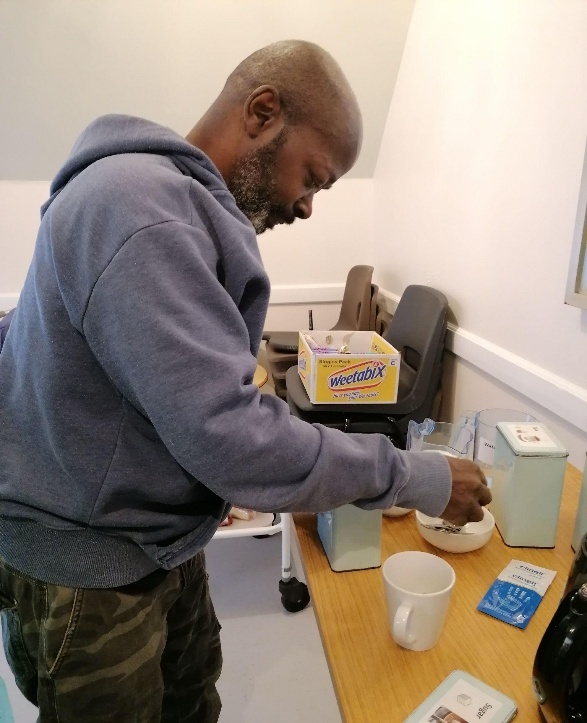
The Breakfast Group d) Food Preparation**


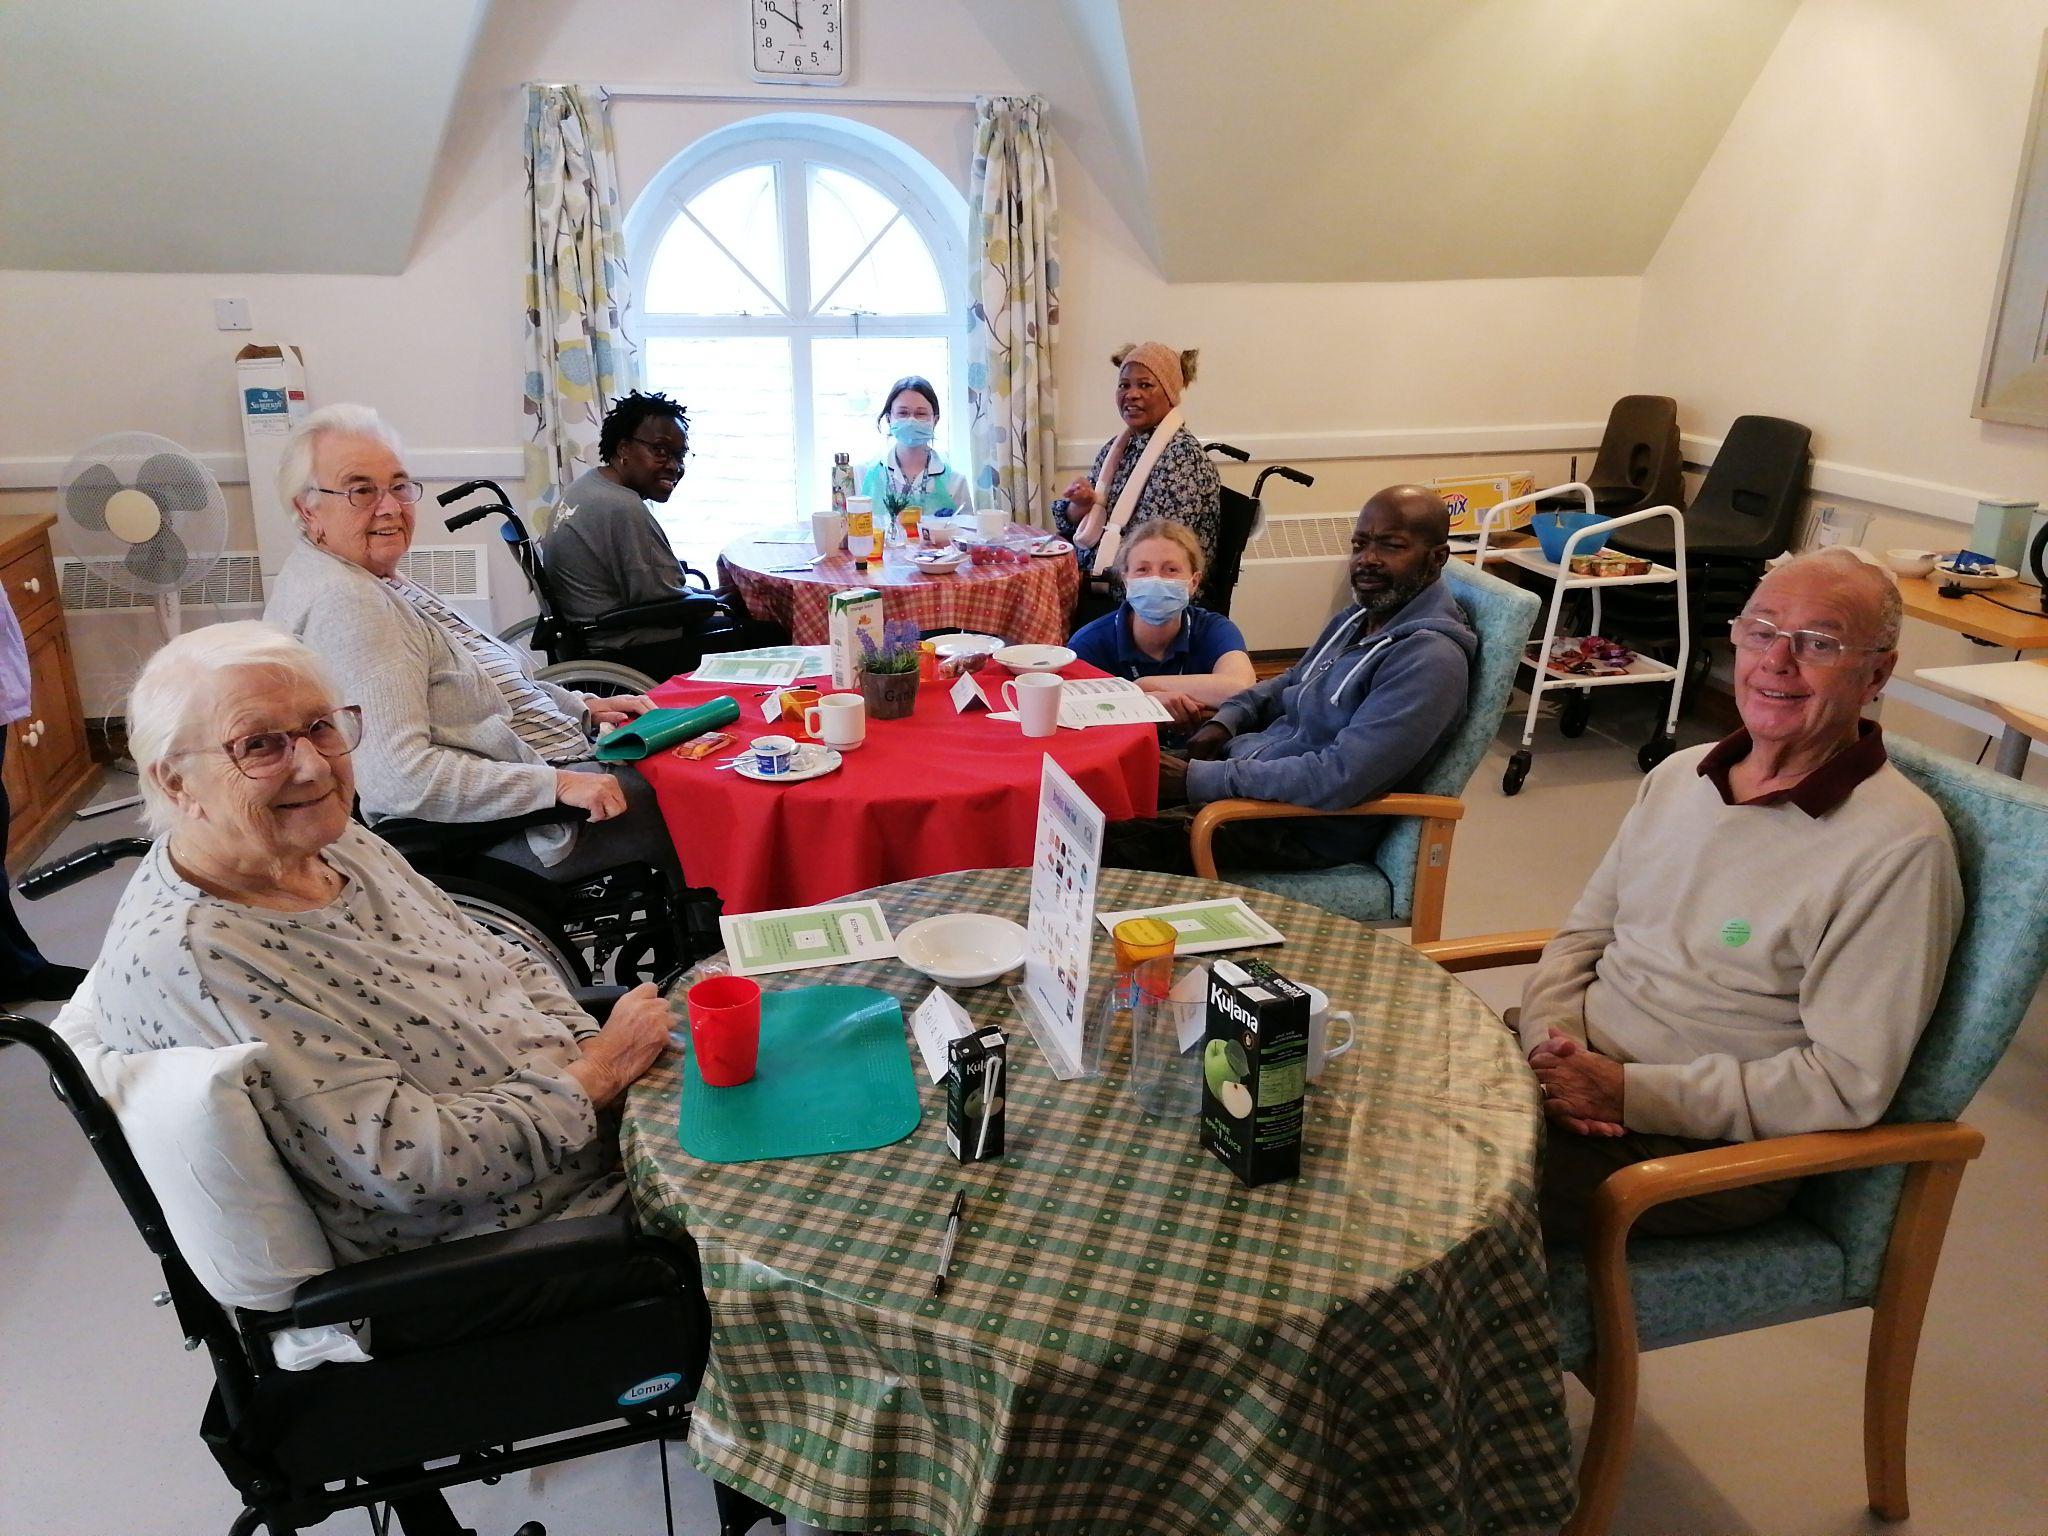

Supplement: Supplementary file 2 [file 6a336ce00078247d28504d02.docx]
