# Supplementary material for: Developing a rehabilitation intervention for eating and drinking difficulties following stroke through co-design stakeholder workshops
Source: Research Square preprint supplement (doi:10.21203/rs.3.rs-8807334/v1), 2026-02-12
Supplement: Supplementary file 1 [file 069ab5c019d71d6c0c5fe913.docx]

**Table 1: Stakeholder Characteristics**

| Stakeholder Group | Gender (n) | Total (n) |
| --- | --- | --- |
| Occupational Therapists | Female (4) | 4 |
| Speech and Language Therapists | Female (3), Male (1) | 4 |
| Dietitians | Female (2) | 2 |
| Stroke Survivors | Female (1), Male (1) | 2 |
| Informal Carer | Female (1) | 1 |
| Nurse | Male (1) | 1 |
| Psychology Assistant | Female (1) | 1 |
| Total Participants | — | **15** |

Characteristics of Stakeholder Intervention Development Group participants across professional and lived-experience roles.
